# Supplementary material
Source: PubMed Central journal article supplement (PMC1871826)
Supplement: pnas_0606454104_1.pdf [file pnas_0606454104_1.pdf]

**Table 1. Twenty numeric variables (A through T) quantifying the contour of the superior end of the mandibular ramus in fossil specimens (shaded) and extant primates**

| <b>Fossil and extant primate specimens</b> | <b>A</b> | <b>B</b> | <b>C</b> | <b>D</b> | <b>E</b> | <b>F</b> | <b>G</b> | <b>H</b> | <b>I</b> | <b>J</b> | <b>K</b> | <b>L</b> | <b>M</b> | <b>N</b> | <b>O</b> | <b>P</b> | <b>Q</b> | <b>R</b> | <b>S</b> | <b>T</b> |
|--------------------------------------------|----------|----------|----------|----------|----------|----------|----------|----------|----------|----------|----------|----------|----------|----------|----------|----------|----------|----------|----------|----------|
| A. L. 822-1 (left ramus)                   | 4        | 14       | 19       | 25       | 26       | 26       | 24       | 21       | 17       | 12       | 1        | -9       | -9       | -7       | -6       | -4       | 3        | 15       | 31       | 51       |
| A. L. 822-1 (right ramus)                  | 2        | 5        | 12       | 20       | 26       | 28       | 29       | 27       | 25       | 21       | 15       | 8        | 0        | 1        | 3        | 9        | 16       | 25       | 38       | 65       |
| A. L. 822-1 (left and right mean)          | 3        | 10       | 16       | 23       | 26       | 27       | 27       | 24       | 21       | 17       | 8        | -1       | -5       | -3       | -2       | 3        | 10       | 20       | 35       | 58       |
| MAK-VP 1/83                                | 2        | 15       | 19       | 22       | 23       | 23       | 22       | 17       | 12       | 2        | -1       | -3       | -2       | -1       | 3        | 7        | 11       | 17       | 30       | 67       |
| SK 23                                      | 3        | 11       | 18       | 22       | 24       | 23       | 21       | 17       | 10       | 0        | -7       | -7       | -6       | -4       | 0        | 5        | 14       | 24       | 38       | 59       |
| SK 34                                      | 0        | 5        | 14       | 19       | 21       | 18       | 14       | 6        | -11      | -14      | -16      | -16      | -15      | -13      | -11      | -6       | 5        | 17       | 40       | 72       |
| GWM5sw/P56                                 | 2        | 6        | 11       | 17       | 21       | 24       | 27       | 28       | 28       | 28       | 27       | 25       | 20       | 5        | -4       | -2       | 2        | 7        | 15       | 31       |
| CCF                                        | 1        | 3        | 5        | 11       | 18       | 24       | 28       | 31       | 32       | 32       | 30       | 24       | 21       | 20       | 18       | 19       | 20       | 25       | 33       | 45       |
| CCF                                        | 1        | 3        | 6        | 17       | 25       | 31       | 36       | 41       | 45       | 46       | 46       | 44       | 39       | 34       | 30       | 29       | 31       | 36       | 43       | 58       |
| CCF                                        | 2        | 4        | 11       | 17       | 21       | 25       | 27       | 28       | 28       | 27       | 25       | 17       | 12       | 10       | 10       | 11       | 13       | 17       | 23       | 37       |
| CCF                                        | 1        | 3        | 7        | 21       | 31       | 35       | 40       | 44       | 47       | 49       | 49       | 49       | 47       | 42       | 36       | 33       | 33       | 35       | 40       | 58       |
| CCF                                        | 1        | 3        | 7        | 12       | 15       | 19       | 21       | 23       | 24       | 23       | 19       | 9        | 8        | 7        | 8        | 9        | 12       | 16       | 23       | 37       |
| CCF                                        | 1        | 4        | 10       | 20       | 27       | 33       | 38       | 43       | 46       | 48       | 49       | 49       | 47       | 43       | 37       | 29       | 27       | 29       | 33       | 39       |
| CCF                                        | 1        | 4        | 10       | 16       | 22       | 27       | 32       | 37       | 41       | 43       | 45       | 45       | 41       | 33       | 27       | 24       | 25       | 29       | 39       | 59       |
| CCF                                        | 1        | 4        | 13       | 18       | 23       | 27       | 31       | 35       | 37       | 38       | 37       | 35       | 26       | 22       | 21       | 21       | 24       | 29       | 38       | 55       |
| CCF                                        | 1        | 5        | 12       | 18       | 22       | 26       | 27       | 27       | 25       | 21       | 12       | 10       | 11       | 13       | 14       | 17       | 22       | 27       | 35       | 58       |
| CCF                                        | 1        | 3        | 7        | 14       | 21       | 25       | 31       | 35       | 39       | 43       | 46       | 48       | 47       | 46       | 42       | 36       | 33       | 34       | 39       | 55       |
| CCF                                        | 1        | 4        | 9        | 16       | 22       | 27       | 31       | 35       | 38       | 39       | 39       | 38       | 33       | 15       | 13       | 14       | 16       | 19       | 24       | 36       |
| CCF                                        | 1        | 3        | 7        | 19       | 25       | 31       | 35       | 39       | 41       | 42       | 42       | 40       | 36       | 31       | 25       | 22       | 24       | 28       | 33       | 51       |
| CCF                                        | 1        | 3        | 7        | 14       | 20       | 24       | 28       | 31       | 33       | 33       | 32       | 29       | 23       | 17       | 14       | 14       | 17       | 22       | 28       | 41       |
| CCF                                        | 1        | 3        | 9        | 14       | 19       | 22       | 25       | 27       | 28       | 28       | 25       | 19       | 4        | 2        | 1        | 3        | 7        | 12       | 19       | 31       |
| CCF                                        | 1        | 2        | 5        | 18       | 26       | 30       | 34       | 38       | 40       | 41       | 42       | 41       | 38       | 33       | 28       | 22       | 20       | 22       | 26       | 34       |
| CCM                                        | 1        | 3        | 9        | 22       | 28       | 33       | 37       | 40       | 41       | 40       | 37       | 30       | 26       | 25       | 27       | 28       | 31       | 35       | 41       | 77       |
| CCM                                        | 1        | 4        | 17       | 26       | 32       | 38       | 42       | 45       | 46       | 45       | 41       | 36       | 34       | 29       | 27       | 25       | 28       | 32       | 39       | 55       |
| CCM                                        | 1        | 3        | 6        | 17       | 24       | 29       | 34       | 37       | 39       | 41       | 41       | 39       | 36       | 32       | 32       | 31       | 33       | 36       | 42       | 57       |
| CCM                                        | 1        | 3        | 13       | 25       | 30       | 35       | 38       | 42       | 44       | 46       | 45       | 44       | 40       | 34       | 27       | 27       | 29       | 29       | 34       | 49       |
| CCM                                        | 1        | 2        | 5        | 9        | 17       | 23       | 27       | 31       | 34       | 36       | 37       | 37       | 34       | 27       | 24       | 27       | 31       | 36       | 44       | 57       |

| <b>Fossil and extant primate specimens</b> | <b>A</b> | <b>B</b> | <b>C</b> | <b>D</b> | <b>E</b> | <b>F</b> | <b>G</b> | <b>H</b> | <b>I</b> | <b>J</b> | <b>K</b> | <b>L</b> | <b>M</b> | <b>N</b> | <b>O</b> | <b>P</b> | <b>Q</b> | <b>R</b> | <b>S</b> | <b>T</b> |
|--------------------------------------------|----------|----------|----------|----------|----------|----------|----------|----------|----------|----------|----------|----------|----------|----------|----------|----------|----------|----------|----------|----------|
| CCM                                        | 1        | 3        | 9        | 14       | 18       | 22       | 24       | 27       | 29       | 30       | 28       | 23       | 18       | 16       | 17       | 20       | 22       | 25       | 29       | 39       |
| CCM                                        | 1        | 4        | 8        | 19       | 26       | 32       | 35       | 37       | 37       | 35       | 31       | 20       | 16       | 15       | 16       | 17       | 19       | 25       | 33       | 54       |
| CCM                                        | 1        | 4        | 14       | 22       | 26       | 30       | 34       | 38       | 40       | 42       | 42       | 39       | 35       | 27       | 24       | 25       | 27       | 32       | 38       | 51       |
| CCM                                        | 1        | 3        | 8        | 19       | 24       | 28       | 31       | 34       | 35       | 34       | 29       | 7        | 5        | 4        | 6        | 9        | 14       | 21       | 32       | 52       |
| CCM                                        | 1        | 5        | 22       | 29       | 35       | 40       | 43       | 46       | 48       | 50       | 51       | 49       | 44       | 36       | 35       | 34       | 35       | 39       | 44       | 57       |
| CCM                                        | 1        | 4        | 13       | 18       | 22       | 26       | 28       | 31       | 32       | 31       | 29       | 26       | 20       | 16       | 15       | 17       | 20       | 23       | 29       | 42       |
| CCM                                        | 1        | 3        | 11       | 16       | 20       | 23       | 24       | 25       | 24       | 22       | 15       | 11       | 9        | 7        | 9        | 11       | 15       | 20       | 28       | 57       |
| CCM                                        | 1        | 4        | 13       | 21       | 28       | 34       | 38       | 42       | 45       | 47       | 46       | 45       | 42       | 36       | 32       | 31       | 32       | 35       | 40       | 73       |
| CCM                                        | 1        | 3        | 11       | 17       | 21       | 25       | 28       | 30       | 31       | 32       | 31       | 29       | 24       | 15       | 14       | 14       | 15       | 19       | 25       | 48       |
| CPF                                        | 1        | 4        | 11       | 18       | 23       | 27       | 30       | 33       | 35       | 35       | 35       | 33       | 32       | 30       | 29       | 28       | 28       | 30       | 35       | 47       |
| CPF                                        | 1        | 4        | 8        | 13       | 17       | 20       | 22       | 23       | 24       | 24       | 24       | 23       | 21       | 18       | 14       | 14       | 16       | 20       | 25       | 46       |
| CPF                                        | 1        | 2        | 10       | 18       | 24       | 28       | 32       | 35       | 36       | 37       | 36       | 35       | 33       | 31       | 29       | 27       | 25       | 29       | 33       | 42       |
| CPF                                        | 1        | 4        | 18       | 28       | 34       | 39       | 44       | 48       | 51       | 54       | 56       | 57       | 57       | 57       | 56       | 52       | 45       | 41       | 45       | 50       |
| CPF                                        | 1        | 3        | 8        | 17       | 26       | 31       | 35       | 40       | 42       | 43       | 43       | 42       | 39       | 36       | 29       | 23       | 21       | 25       | 33       | 54       |
| CPF                                        | 1        | 4        | 10       | 20       | 26       | 31       | 34       | 36       | 38       | 39       | 39       | 39       | 38       | 37       | 34       | 31       | 31       | 33       | 37       | 48       |
| CPF                                        | 1        | 5        | 16       | 20       | 23       | 25       | 27       | 28       | 28       | 28       | 25       | 22       | 17       | 11       | 10       | 11       | 14       | 19       | 25       | 41       |
| CPF                                        | 1        | 4        | 15       | 18       | 21       | 24       | 26       | 27       | 27       | 27       | 25       | 23       | 20       | 18       | 17       | 16       | 18       | 21       | 26       | 49       |
| CPF                                        | 1        | 6        | 20       | 26       | 30       | 33       | 35       | 37       | 37       | 37       | 35       | 33       | 29       | 22       | 15       | 16       | 19       | 23       | 28       | 48       |
| CPF                                        | 1        | 6        | 19       | 25       | 30       | 33       | 37       | 39       | 40       | 41       | 40       | 38       | 35       | 33       | 32       | 34       | 37       | 41       | 46       | 57       |
| CPF                                        | 1        | 3        | 8        | 18       | 24       | 28       | 32       | 34       | 36       | 37       | 37       | 36       | 33       | 29       | 24       | 21       | 20       | 23       | 29       | 47       |
| CPF                                        | 1        | 3        | 7        | 22       | 30       | 35       | 38       | 41       | 42       | 43       | 42       | 40       | 37       | 32       | 26       | 23       | 24       | 26       | 29       | 42       |
| CPF                                        | 1        | 4        | 10       | 16       | 20       | 24       | 27       | 31       | 39       | 34       | 34       | 32       | 30       | 28       | 25       | 21       | 16       | 17       | 24       | 45       |
| CPF                                        | 1        | 3        | 11       | 21       | 27       | 31       | 35       | 39       | 41       | 43       | 45       | 45       | 45       | 44       | 42       | 39       | 37       | 39       | 43       | 55       |
| CPF                                        | 1        | 8        | 13       | 18       | 21       | 24       | 25       | 26       | 26       | 24       | 21       | 18       | 13       | 9        | 8        | 8        | 10       | 14       | 19       | 32       |
| CPM                                        | 3        | 14       | 21       | 26       | 30       | 33       | 36       | 38       | 39       | 39       | 39       | 37       | 34       | 31       | 26       | 26       | 27       | 31       | 36       | 60       |
| CPM                                        | 1        | 4        | 23       | 29       | 33       | 36       | 38       | 39       | 38       | 38       | 37       | 35       | 32       | 29       | 28       | 30       | 34       | 39       | 47       | 66       |
| CPM                                        | 1        | 4        | 11       | 16       | 20       | 23       | 26       | 28       | 30       | 31       | 30       | 29       | 26       | 24       | 21       | 16       | 18       | 21       | 28       | 40       |
| CPM                                        | 1        | 5        | 14       | 21       | 25       | 28       | 30       | 30       | 30       | 28       | 26       | 23       | 19       | 15       | 12       | 11       | 11       | 14       | 24       | 51       |
| CPM                                        | 1        | 3        | 7        | 16       | 20       | 23       | 25       | 25       | 25       | 23       | 22       | 19       | 16       | 12       | 9        | 9        | 13       | 17       | 26       | 53       |
| CPM                                        | 1        | 4        | 9        | 18       | 22       | 25       | 26       | 27       | 26       | 25       | 23       | 21       | 19       | 15       | 13       | 14       | 18       | 24       | 35       | 58       |
| CPM                                        | 1        | 3        | 13       | 21       | 26       | 30       | 32       | 33       | 33       | 31       | 28       | 25       | 23       | 21       | 19       | 18       | 19       | 24       | 29       | 44       |
| CPM                                        | 1        | 5        | 14       | 21       | 26       | 31       | 33       | 35       | 36       | 35       | 32       | 29       | 26       | 26       | 27       | 28       | 31       | 35       | 43       | 60       |
| CPM                                        | 1        | 3        | 8        | 15       | 19       | 23       | 26       | 28       | 29       | 29       | 28       | 26       | 22       | 16       | 13       | 14       | 16       | 20       | 28       | 45       |
| CPM                                        | 2        | 5        | 17       | 22       | 25       | 27       | 29       | 31       | 32       | 31       | 30       | 27       | 25       | 23       | 21       | 21       | 23       | 26       | 28       | 36       |
| CPM                                        | 1        | 6        | 15       | 21       | 26       | 30       | 33       | 36       | 38       | 40       | 41       | 42       | 42       | 41       | 39       | 37       | 32       | 34       | 38       | 60       |
| CPM                                        | 1        | 3        | 13       | 18       | 21       | 24       | 25       | 25       | 24       | 22       | 19       | 17       | 14       | 11       | 11       | 12       | 13       | 15       | 22       | 40       |

| <b>Fossil and extant primate specimens</b> | <b>A</b> | <b>B</b> | <b>C</b> | <b>D</b> | <b>E</b> | <b>F</b> | <b>G</b> | <b>H</b> | <b>I</b> | <b>J</b> | <b>K</b> | <b>L</b> | <b>M</b> | <b>N</b> | <b>O</b> | <b>P</b> | <b>Q</b> | <b>R</b> | <b>S</b> | <b>T</b> |
|--------------------------------------------|----------|----------|----------|----------|----------|----------|----------|----------|----------|----------|----------|----------|----------|----------|----------|----------|----------|----------|----------|----------|
| CPM                                        | 1        | 5        | 14       | 19       | 22       | 24       | 26       | 27       | 27       | 25       | 24       | 21       | 18       | 13       | 7        | 6        | 9        | 15       | 27       | 53       |
| CPM                                        | 2        | 5        | 11       | 16       | 19       | 21       | 23       | 24       | 24       | 23       | 20       | 17       | 11       | 2        | -3       | -2       | 1        | 7        | 18       | 35       |
| GF                                         | 1        | 10       | 17       | 23       | 27       | 31       | 33       | 33       | 32       | 29       | 25       | 17       | 5        | 1        | 0        | 2        | 4        | 7        | 16       | 32       |
| GF                                         | 1        | 5        | 22       | 28       | 32       | 36       | 39       | 40       | 39       | 36       | 30       | 20       | 13       | 11       | 12       | 13       | 15       | 19       | 27       | 45       |
| GF                                         | 1        | 5        | 16       | 21       | 25       | 28       | 30       | 31       | 30       | 29       | 26       | 23       | 18       | 9        | 1        | 2        | 5        | 10       | 18       | 36       |
| GF                                         | 2        | 11       | 24       | 29       | 32       | 35       | 36       | 35       | 34       | 30       | 24       | 18       | 12       | 10       | 8        | 8        | 11       | 16       | 22       | 35       |
| GF                                         | 1        | 6        | 16       | 22       | 26       | 29       | 31       | 31       | 30       | 28       | 26       | 23       | 17       | 8        | 3        | 3        | 6        | 12       | 22       | 50       |
| GF                                         | 1        | 4        | 12       | 18       | 23       | 26       | 29       | 30       | 28       | 24       | 10       | -2       | -5       | -3       | 1        | 6        | 11       | 17       | 28       | 44       |
| GF                                         | 1        | 4        | 18       | 26       | 31       | 36       | 39       | 41       | 42       | 41       | 39       | 34       | 9        | 7        | 8        | 10       | 14       | 19       | 27       | 44       |
| GF                                         | 3        | 12       | 18       | 24       | 28       | 30       | 31       | 30       | 27       | 22       | 6        | 2        | 2        | 4        | 6        | 9        | 13       | 19       | 26       | 43       |
| GF                                         | 1        | 4        | 14       | 20       | 24       | 26       | 27       | 26       | 24       | 19       | 8        | -2       | -7       | -8       | -6       | -3       | 2        | 9        | 20       | 42       |
| GF                                         | 1        | 9        | 27       | 33       | 37       | 40       | 41       | 42       | 41       | 39       | 36       | 31       | 20       | 12       | 10       | 12       | 16       | 21       | 28       | 41       |
| GF                                         | 1        | 5        | 18       | 28       | 33       | 36       | 38       | 39       | 38       | 36       | 31       | 23       | 6        | 1        | 2        | 2        | 5        | 8        | 11       | 16       |
| GF                                         | 1        | 2        | 11       | 23       | 28       | 32       | 35       | 35       | 31       | 27       | 22       | 10       | 9        | 10       | 12       | 15       | 19       | 23       | 30       | 51       |
| GF                                         | 1        | 5        | 21       | 26       | 29       | 33       | 34       | 33       | 30       | 22       | -5       | -7       | -6       | -4       | 0        | 4        | 9        | 16       | 27       | 46       |
| GF                                         | 1        | 5        | 19       | 24       | 27       | 30       | 31       | 29       | 26       | 20       | 9        | -8       | -11      | -11      | -9       | -6       | -2       | 3        | 10       | 29       |
| GM                                         | 2        | 5        | 10       | 15       | 19       | 23       | 26       | 29       | 28       | 26       | -2       | -8       | -7       | -6       | -3       | 1        | 6        | 12       | 21       | 40       |
| GM                                         | 1        | 9        | 17       | 21       | 27       | 29       | 29       | 28       | 25       | 22       | 15       | -4       | -11      | -11      | -9       | -7       | -3       | 3        | 11       | 31       |
| GM                                         | 2        | 8        | 14       | 19       | 21       | 23       | 23       | 20       | -9       | -10      | -8       | -6       | -3       | 2        | 7        | 12       | 18       | 25       | 38       | 64       |
| GM                                         | 2        | 5        | 22       | 29       | 35       | 38       | 40       | 40       | 39       | 35       | 26       | 0        | -6       | -4       | -2       | 2        | 7        | 13       | 24       | 41       |
| GM                                         | 1        | 3        | 7        | 16       | 20       | 23       | 25       | 25       | -17      | -16      | -16      | -14      | -11      | -8       | -4       | 2        | 8        | 18       | 35       | 67       |
| GM                                         | 2        | 9        | 17       | 22       | 26       | 29       | 31       | 31       | 29       | 25       | 4        | -5       | -7       | -4       | -1       | 3        | 7        | 13       | 20       | 32       |
| GM                                         | 2        | 10       | 15       | 17       | 19       | 18       | 16       | -11      | -13      | -15      | -15      | -15      | -12      | -10      | -7       | -3       | 3        | 12       | 24       | 48       |
| GM                                         | 3        | 8        | 29       | 35       | 40       | 45       | 47       | 48       | 47       | 45       | 42       | 37       | 26       | 10       | 9        | 10       | 14       | 17       | 23       | 36       |
| GM                                         | 1        | 5        | 19       | 26       | 30       | 33       | 34       | 34       | 32       | 28       | 21       | 7        | 5        | 5        | 7        | 10       | 13       | 18       | 24       | 36       |
| GM                                         | 1        | 3        | 12       | 16       | 20       | 22       | 22       | 19       | 14       | 2        | -22      | -26      | -27      | -26      | -23      | -19      | -14      | -9       | -2       | 6        |
| GM                                         | 1        | 7        | 22       | 26       | 29       | 30       | 29       | 28       | 24       | 19       | 11       | 0        | -2       | -2       | 1        | 5        | 12       | 20       | 33       | 56       |
| GM                                         | 1        | 5        | 18       | 26       | 30       | 33       | 34       | 34       | 32       | 30       | 26       | 16       | 9        | 7        | 6        | 7        | 10       | 14       | 20       | 44       |
| GM                                         | 1        | 4        | 15       | 23       | 29       | 34       | 37       | 38       | 39       | 38       | 35       | 31       | 22       | 16       | 15       | 16       | 20       | 25       | 33       | 52       |
| GM                                         | 2        | 7        | 19       | 23       | 27       | 30       | 32       | 34       | 34       | 33       | 32       | 29       | 25       | 13       | 11       | 11       | 14       | 18       | 27       | 55       |
| GM                                         | 1        | 3        | 14       | 25       | 28       | 29       | 28       | 25       | 19       | -5       | -9       | -9       | -8       | -6       | -3       | 1        | 6        | 12       | 20       | 38       |
| GM                                         | 1        | 6        | 13       | 18       | 23       | 27       | 30       | 32       | 34       | 33       | 29       | 17       | -8       | -8       | -6       | -3       | 3        | 12       | 24       | 40       |
| GM                                         | 2        | 14       | 19       | 23       | 29       | 33       | 34       | 33       | 27       | -6       | -7       | -6       | -4       | -1       | 4        | 9        | 19       | 37       | 56       | 78       |
| H                                          | 1        | 6        | 30       | 37       | 40       | 43       | 45       | 46       | 46       | 45       | 43       | 40       | 37       | 33       | 28       | 16       | 15       | 15       | 20       | 45       |
| H                                          | 1        | 5        | 13       | 23       | 30       | 36       | 40       | 43       | 45       | 46       | 45       | 44       | 42       | 41       | 39       | 38       | 38       | 39       | 42       | 54       |
| H                                          | 1        | 3        | 9        | 31       | 38       | 43       | 46       | 49       | 50       | 49       | 47       | 44       | 39       | 34       | 29       | 25       | 22       | 22       | 25       | 35       |

| Fossil and extant primate specimens | A | B  | C  | D  | E  | F  | G  | H  | I  | J  | K  | L  | M  | N  | O  | P  | Q  | R  | S  | T  |
|-------------------------------------|---|----|----|----|----|----|----|----|----|----|----|----|----|----|----|----|----|----|----|----|
| H                                   | 1 | 4  | 11 | 24 | 29 | 31 | 33 | 33 | 33 | 32 | 30 | 27 | 23 | 20 | 18 | 14 | 12 | 11 | 14 | 24 |
| H                                   | 1 | 3  | 9  | 19 | 29 | 37 | 41 | 45 | 46 | 47 | 46 | 45 | 42 | 39 | 34 | 30 | 27 | 25 | 26 | 37 |
| H                                   | 2 | 5  | 9  | 18 | 29 | 32 | 34 | 35 | 35 | 34 | 33 | 30 | 26 | 22 | 17 | 14 | 12 | 13 | 15 | 28 |
| H                                   | 1 | 4  | 8  | 32 | 40 | 44 | 46 | 48 | 49 | 47 | 44 | 40 | 35 | 29 | 21 | 15 | 12 | 13 | 18 | 29 |
| H                                   | 1 | 5  | 16 | 29 | 34 | 38 | 42 | 43 | 43 | 43 | 41 | 39 | 36 | 34 | 30 | 25 | 24 | 26 | 30 | 36 |
| H                                   | 1 | 4  | 14 | 36 | 41 | 46 | 49 | 52 | 53 | 54 | 53 | 52 | 51 | 49 | 48 | 46 | 45 | 43 | 44 | 50 |
| H                                   | 1 | 3  | 7  | 16 | 31 | 36 | 39 | 40 | 39 | 37 | 34 | 30 | 27 | 23 | 20 | 18 | 17 | 17 | 19 | 28 |
| H                                   | 1 | 3  | 7  | 30 | 36 | 39 | 42 | 44 | 45 | 45 | 45 | 42 | 38 | 34 | 29 | 26 | 24 | 24 | 27 | 35 |
| H                                   | 1 | 5  | 12 | 43 | 47 | 51 | 54 | 56 | 57 | 57 | 56 | 54 | 51 | 47 | 41 | 36 | 34 | 34 | 37 | 46 |
| H                                   | 1 | 4  | 24 | 34 | 40 | 47 | 51 | 53 | 56 | 58 | 59 | 58 | 55 | 52 | 47 | 42 | 38 | 39 | 42 | 53 |
| H                                   | 1 | 5  | 26 | 34 | 41 | 45 | 49 | 52 | 54 | 54 | 54 | 53 | 49 | 44 | 38 | 30 | 28 | 28 | 33 | 52 |
| H                                   | 1 | 3  | 8  | 34 | 42 | 47 | 50 | 53 | 53 | 52 | 50 | 48 | 45 | 42 | 38 | 34 | 32 | 30 | 30 | 35 |
| H                                   | 2 | 15 | 26 | 35 | 39 | 44 | 46 | 48 | 49 | 48 | 46 | 44 | 41 | 38 | 34 | 30 | 29 | 29 | 31 | 39 |
| H                                   | 1 | 2  | 4  | 17 | 21 | 25 | 27 | 29 | 31 | 32 | 31 | 29 | 27 | 24 | 21 | 18 | 12 | 11 | 13 | 21 |
| H                                   | 1 | 4  | 35 | 40 | 44 | 46 | 48 | 49 | 48 | 45 | 42 | 37 | 30 | 24 | 17 | -2 | -1 | 3  | 10 | 21 |
| H                                   | 1 | 3  | 20 | 28 | 32 | 35 | 38 | 40 | 41 | 41 | 39 | 37 | 34 | 29 | 13 | 10 | 8  | 8  | 12 | 23 |
| H                                   | 1 | 2  | 8  | 22 | 34 | 40 | 45 | 49 | 52 | 53 | 53 | 52 | 49 | 48 | 45 | 39 | 34 | 32 | 33 | 44 |
| H                                   | 1 | 3  | 6  | 10 | 34 | 38 | 41 | 42 | 43 | 43 | 41 | 39 | 36 | 34 | 32 | 29 | 27 | 25 | 28 | 36 |
| H                                   | 1 | 5  | 21 | 28 | 34 | 40 | 43 | 47 | 47 | 50 | 49 | 46 | 44 | 41 | 39 | 36 | 35 | 36 | 40 | 54 |
| H                                   | 1 | 4  | 27 | 34 | 39 | 44 | 48 | 50 | 52 | 52 | 51 | 49 | 47 | 46 | 44 | 43 | 41 | 42 | 45 | 57 |
| H                                   | 1 | 4  | 21 | 27 | 32 | 36 | 39 | 43 | 45 | 46 | 46 | 44 | 42 | 40 | 36 | 32 | 29 | 31 | 35 | 48 |
| H                                   | 1 | 14 | 23 | 27 | 31 | 34 | 36 | 38 | 38 | 38 | 36 | 34 | 32 | 29 | 27 | 24 | 21 | 20 | 24 | 37 |
| H                                   | 1 | 3  | 12 | 23 | 29 | 34 | 37 | 40 | 41 | 42 | 42 | 40 | 37 | 36 | 34 | 33 | 33 | 33 | 35 | 45 |
| H                                   | 1 | 2  | 7  | 26 | 32 | 36 | 40 | 42 | 45 | 46 | 46 | 46 | 45 | 43 | 40 | 37 | 34 | 34 | 36 | 45 |
| H                                   | 1 | 3  | 9  | 28 | 34 | 40 | 43 | 45 | 47 | 48 | 48 | 45 | 42 | 38 | 30 | 25 | 24 | 25 | 29 | 46 |
| H                                   | 1 | 3  | 8  | 26 | 31 | 35 | 38 | 38 | 37 | 36 | 33 | 31 | 29 | 27 | 25 | 24 | 24 | 25 | 28 | 41 |
| H                                   | 1 | 2  | 6  | 31 | 38 | 43 | 46 | 48 | 49 | 50 | 49 | 47 | 44 | 40 | 35 | 31 | 28 | 28 | 31 | 49 |
| H                                   | 1 | 3  | 24 | 34 | 41 | 46 | 49 | 52 | 54 | 55 | 54 | 52 | 49 | 45 | 40 | 37 | 35 | 35 | 37 | 49 |
| H                                   | 1 | 6  | 27 | 37 | 43 | 47 | 50 | 51 | 51 | 50 | 48 | 46 | 42 | 38 | 31 | 27 | 24 | 25 | 27 | 34 |
| H                                   | 1 | 4  | 8  | 41 | 45 | 50 | 53 | 56 | 58 | 59 | 60 | 61 | 59 | 57 | 54 | 47 | 42 | 41 | 44 | 53 |
| H                                   | 1 | 3  | 24 | 28 | 32 | 34 | 36 | 37 | 37 | 37 | 35 | 33 | 30 | 26 | 24 | 23 | 22 | 20 | 22 | 46 |
| H                                   | 2 | 16 | 24 | 30 | 34 | 37 | 40 | 43 | 44 | 43 | 42 | 40 | 38 | 34 | 32 | 30 | 27 | 26 | 29 | 36 |
| H                                   | 1 | 4  | 25 | 32 | 36 | 40 | 42 | 44 | 44 | 44 | 43 | 42 | 40 | 38 | 37 | 36 | 34 | 30 | 30 | 39 |
| H                                   | 1 | 4  | 28 | 35 | 39 | 43 | 46 | 49 | 50 | 50 | 50 | 49 | 48 | 46 | 44 | 43 | 43 | 43 | 44 | 55 |
| H                                   | 1 | 4  | 33 | 40 | 44 | 48 | 51 | 54 | 56 | 58 | 58 | 57 | 54 | 51 | 49 | 48 | 46 | 46 | 43 | 51 |
| H                                   | 1 | 3  | 15 | 30 | 35 | 39 | 41 | 43 | 44 | 43 | 41 | 39 | 36 | 34 | 29 | 26 | 22 | 20 | 22 | 29 |

| Fossil and extant primate specimens | A | B  | C  | D  | E  | F  | G  | H  | I  | J  | K  | L  | M  | N  | O  | P  | Q  | R  | S  | T  |
|-------------------------------------|---|----|----|----|----|----|----|----|----|----|----|----|----|----|----|----|----|----|----|----|
| H                                   | 1 | 4  | 32 | 41 | 47 | 52 | 57 | 60 | 62 | 63 | 62 | 61 | 58 | 56 | 54 | 51 | 45 | 42 | 46 | 65 |
| H                                   | 2 | 5  | 24 | 30 | 34 | 38 | 40 | 42 | 43 | 44 | 44 | 43 | 40 | 36 | 32 | 28 | 28 | 31 | 34 | 42 |
| OrF                                 | 1 | 3  | 8  | 18 | 25 | 29 | 31 | 34 | 35 | 34 | 34 | 32 | 30 | 22 | 18 | 17 | 20 | 27 | 40 | 63 |
| OrF                                 | 1 | 3  | 8  | 19 | 28 | 33 | 37 | 41 | 43 | 44 | 45 | 44 | 41 | 38 | 34 | 31 | 28 | 25 | 30 | 49 |
| OrF                                 | 2 | 4  | 26 | 31 | 36 | 40 | 43 | 46 | 47 | 47 | 46 | 45 | 43 | 41 | 38 | 32 | 25 | 26 | 33 | 51 |
| OrF                                 | 1 | 4  | 13 | 21 | 26 | 30 | 33 | 37 | 39 | 40 | 41 | 41 | 39 | 37 | 34 | 30 | 26 | 23 | 26 | 36 |
| OrF                                 | 1 | 3  | 8  | 25 | 32 | 37 | 41 | 44 | 45 | 46 | 45 | 44 | 42 | 38 | 35 | 24 | 21 | 23 | 28 | 42 |
| OrF                                 | 1 | 18 | 25 | 31 | 36 | 38 | 40 | 41 | 41 | 40 | 39 | 35 | 29 | 13 | 9  | 10 | 11 | 14 | 19 | 35 |
| OrM                                 | 1 | 4  | 18 | 26 | 31 | 35 | 37 | 39 | 39 | 39 | 38 | 36 | 33 | 29 | 24 | 18 | 16 | 19 | 26 | 54 |
| OrM                                 | 1 | 4  | 8  | 13 | 21 | 28 | 35 | 37 | 38 | 37 | 34 | 30 | 24 | 15 | 6  | 6  | 9  | 14 | 20 | 55 |
| OrM                                 | 2 | 7  | 17 | 26 | 35 | 39 | 42 | 43 | 44 | 44 | 43 | 42 | 40 | 36 | 29 | 7  | 7  | 10 | 14 | 23 |
| OrM                                 | 1 | 3  | 6  | 17 | 27 | 33 | 38 | 41 | 45 | 47 | 49 | 49 | 49 | 47 | 45 | 41 | 38 | 35 | 39 | 50 |
| OrM                                 | 1 | 2  | 5  | 12 | 26 | 32 | 36 | 40 | 41 | 43 | 42 | 41 | 38 | 35 | 29 | 25 | 26 | 29 | 33 | 47 |
| OrM                                 | 1 | 7  | 19 | 29 | 37 | 43 | 48 | 52 | 54 | 56 | 56 | 55 | 53 | 49 | 43 | 36 | 35 | 39 | 48 | 81 |
| OrM                                 | 1 | 4  | 14 | 19 | 23 | 27 | 33 | 38 | 41 | 43 | 45 | 46 | 45 | 43 | 41 | 38 | 32 | 31 | 34 | 47 |
| OrM                                 | 1 | 3  | 6  | 18 | 26 | 32 | 36 | 39 | 41 | 42 | 42 | 41 | 38 | 35 | 23 | 20 | 20 | 24 | 29 | 59 |
| OrM                                 | 1 | 16 | 24 | 31 | 35 | 39 | 41 | 43 | 44 | 44 | 43 | 40 | 36 | 30 | 17 | 10 | 11 | 12 | 18 | 50 |
| OrM                                 | 2 | 5  | 15 | 25 | 33 | 39 | 43 | 46 | 48 | 50 | 50 | 49 | 47 | 45 | 42 | 30 | 13 | 16 | 21 | 35 |

A. L. 822-1 and MAK-VP 1/83, *Australopithecus afarensis*; SK 23 and SK 34, *Au. robustus*; GWM5sw/P56, *Ardipithecus ramidus*; CCF, common chimpanzee, female; CCM, common chimpanzee, male; CPF, pygmy chimpanzee, female; CPM, pygmy chimpanzee, male; GF, gorilla, female; GM, gorilla, male; H, *Homo sapiens*; OrF, orangutan, female; OrM, orangutan, male.
