# Supplementary material
Source: PubMed Central journal article supplement (PMC1871826)
Supplement: pnas_0606454104_2.pdf [file pnas_0606454104_2.pdf]

**Table 2. Classification matrix of observed classifications (rows) and predicted classifications (columns)**

|       |                            | <b>CC</b>       | <b>CP</b>       | <b>G</b>        | <b>H</b>        | <b>Or</b>       |
|-------|----------------------------|-----------------|-----------------|-----------------|-----------------|-----------------|
| Group | Percent correctly assigned | $P =$<br>.19863 | $P =$<br>.19863 | $P =$<br>.21233 | $P =$<br>.28082 | $P =$<br>.10959 |
| CC    | 68.96552                   | 20              | 6               | 1               | 1               | 1               |
| CP    | 82.75862                   | 2               | 24              | 0               | 2               | 1               |
| G     | 89.28571                   | 1               | 2               | 25              | 0               | 0               |
| H     | 92.5                       | 0               | 2               | 0               | 37              | 1               |
| Or    | 81.25                      | 1               | 1               | 0               | 1               | 13              |
|       |                            | -----           | -----           | -----           | -----           | -----           |
| Total | 81.50685                   | 24              | 35              | 26              | 41              | 16              |

CC, common chimpanzee; CP, pygmy chimpanzee; G, gorilla; H, *Homo sapiens*; Or, orangutan.
