# Supplementary material
Source: PubMed Central journal article supplement (PMC1871826)
Supplement: pnas_0606454104_3.pdf [file pnas_0606454104_3.pdf]

**Table 3. Posterior probabilities of individual cases**

|                                      | CC           | CP           | G            | H            | Or           |
|--------------------------------------|--------------|--------------|--------------|--------------|--------------|
| Observed classification              | $P = .19863$ | $P = .19863$ | $P = .21233$ | $P = .28082$ | $P = .10959$ |
| Fossil and extant primate specimens  |              |              |              |              |              |
| A. L. 822-1 (mean of right and left) | 0.0000114    | 0.000249     | 0.9997396    | 0            | 0.0000001    |
| MAK-VP 1/83                          | 0.0003862    | 0.069403     | 0.9272528    | 0.0000288    | 0.0029291    |
| SK 23                                | 0.0000798    | 0.025281     | 0.9746387    | 0.0000003    | 0.0000001    |
| SK34                                 | 0.000142     | 0.4480224    | 0.5518337    | 0.0000005    | 0.0000014    |
| GWM5sw/P56                           | 0.6994731    | 0.2823546    | 0.0106023    | 0.0003087    | 0.0072613    |
| CC                                   | 0.9166355    | 0.0794079    | 0.0002959    | 0.00009      | 0.0035708    |
| CC                                   | 0.9338076    | 0.0632607    | 0.0000042    | 0.0000679    | 0.0028596    |
| CC                                   | 0.6333931    | 0.290616     | 0.0731505    | 0.0011388    | 0.0017016    |
| CC*                                  | 0.2030173    | 0.4658449    | 0.0000043    | 0.0767034    | 0.2544301    |
| CC                                   | 0.8865159    | 0.1131607    | 0.0001165    | 0.0000082    | 0.0001988    |
| CC*                                  | 0.396032     | 0.1540971    | 0.0000003    | 0.0285446    | 0.421326     |
| CC                                   | 0.7807031    | 0.1940517    | 0.0000004    | 0.0000095    | 0.0252354    |
| CC                                   | 0.7174883    | 0.2807858    | 0.0009362    | 0.0000236    | 0.0007661    |
| CC*                                  | 0.2550843    | 0.6802444    | 0.0584378    | 0.0031331    | 0.0031004    |
| CC*                                  | 0.2077444    | 0.6275209    | 0            | 0.0002664    | 0.1644683    |
| CC                                   | 0.9964129    | 0.0031013    | 0.0000037    | 0.0000024    | 0.0004798    |
| CC                                   | 0.8362818    | 0.1331441    | 0.0000054    | 0.001789     | 0.0287797    |
| CC                                   | 0.8676934    | 0.1315847    | 0.0000741    | 0.0000348    | 0.0006129    |
| CC*                                  | 0.2425182    | 0.209681     | 0.547564     | 0.0001212    | 0.0001155    |
| CC*                                  | 0.2853678    | 0.5205429    | 0.0000028    | 0.0500334    | 0.144053     |
| CC                                   | 0.9198151    | 0.0538208    | 0.0023057    | 0.0002926    | 0.0237659    |
| CC                                   | 0.9069969    | 0.0313566    | 0.0088076    | 0.0222849    | 0.030554     |
| CC                                   | 0.961293     | 0.0369995    | 0.0000107    | 0.0000777    | 0.0016191    |
| CC*                                  | 0.1276933    | 0.3605757    | 0.0001091    | 0.4911542    | 0.0204678    |
| CC                                   | 0.964039     | 0.0359109    | 0.0000002    | 0.0000004    | 0.0000495    |
| CC                                   | 0.6025618    | 0.3972138    | 0.0000606    | 0.0000868    | 0.0000769    |
| CC                                   | 0.8680326    | 0.0234521    | 0.0942837    | 0.0010337    | 0.0131979    |
| CC                                   | 0.8210345    | 0.1784562    | 0.0000198    | 0.0000859    | 0.0004036    |
| CC                                   | 0.9719307    | 0.0070497    | 0.020958     | 0.0000018    | 0.0000599    |
| CC                                   | 0.7519901    | 0.2026023    | 0.0005965    | 0.0331306    | 0.0116805    |
| CC*                                  | 0.4763084    | 0.5196393    | 0.001936     | 0.0013912    | 0.0007251    |
| CC*                                  | 0.4291076    | 0.5632012    | 0.0058433    | 0.0000559    | 0.001792     |

|     | <b>CC</b> | <b>CP</b> | <b>G</b>  | <b>H</b>  | <b>Or</b> |
|-----|-----------|-----------|-----------|-----------|-----------|
| CC  | 0.5244561 | 0.1369174 | 0.0000049 | 0.0012158 | 0.3374058 |
| CC  | 0.8650171 | 0.1294124 | 0.0001286 | 0.0000376 | 0.0054044 |
| CP  | 0.3410284 | 0.6501701 | 0.0000077 | 0.0027076 | 0.0060862 |
| CP  | 0.1236706 | 0.874154  | 0.0000012 | 0.0000736 | 0.0021005 |
| CP  | 0.3199579 | 0.6653777 | 0.0000239 | 0.0050406 | 0.0095999 |
| CP* | 0.0007376 | 0.0097284 | 0.0000007 | 0.9465127 | 0.0430206 |
| CP* | 0.0526267 | 0.26233   | 0.0000008 | 0.0023631 | 0.6826794 |
| CP  | 0.2703248 | 0.6297411 | 0.0000071 | 0.062779  | 0.0371481 |
| CP  | 0.3002785 | 0.6965078 | 0.0023303 | 0.0002897 | 0.0005937 |
| CP  | 0.1890113 | 0.803347  | 0.000117  | 0.0007204 | 0.0068043 |
| CP  | 0.0608556 | 0.8414389 | 0.0010631 | 0.0828615 | 0.0137809 |
| CP  | 0.31167   | 0.6762212 | 0.0010279 | 0.010262  | 0.0008189 |
| CP  | 0.253801  | 0.6125684 | 0.0000328 | 0.0080835 | 0.1255143 |
| CP* | 0.1580555 | 0.185447  | 0.0000396 | 0.5802843 | 0.0761735 |
| CP  | 0.0332707 | 0.6106814 | 0.0000006 | 0.0005462 | 0.3555012 |
| CP  | 0.1617748 | 0.8164766 | 0.0000002 | 0.0075457 | 0.0142027 |
| CP  | 0.2235764 | 0.7652879 | 0.0025388 | 0.0025822 | 0.0060146 |
| CP  | 0.0261887 | 0.7895115 | 0.001431  | 0.006994  | 0.1758748 |
| CP  | 0.1359546 | 0.8324113 | 0.0120243 | 0.0188678 | 0.0007419 |
| CP  | 0.2482366 | 0.7470868 | 0.000004  | 0.000199  | 0.0044736 |
| CP  | 0.0591229 | 0.6067051 | 0.0354555 | 0.0159558 | 0.2827606 |
| CP  | 0.3684963 | 0.6228685 | 0.0007951 | 0.0002855 | 0.0075546 |
| CP  | 0.2075397 | 0.7912493 | 0.0002827 | 0.000054  | 0.0008743 |
| CP  | 0.2699503 | 0.6869442 | 0.0020787 | 0.0293056 | 0.0117212 |
| CP* | 0.5429015 | 0.4473162 | 0.0033511 | 0.0030107 | 0.0034204 |
| CP* | 0.6603218 | 0.3374437 | 0.0002055 | 0.0000985 | 0.0019304 |
| CP  | 0.0577692 | 0.9375236 | 0.0000839 | 0.0044324 | 0.0001909 |
| CP  | 0.0189461 | 0.7492481 | 0.0000002 | 0.0054788 | 0.2263267 |
| CP  | 0.1306234 | 0.8351656 | 0.0165977 | 0.0109305 | 0.0066828 |
| CP  | 0.0552483 | 0.9367065 | 0.0003315 | 0.0000751 | 0.0076385 |
| CP  | 0.2260652 | 0.7335346 | 0.0391334 | 0.0000286 | 0.0012382 |
| G   | 0.0000928 | 0.0000803 | 0.9994229 | 0.0002598 | 0.000144  |
| G   | 0.0008298 | 0.0002609 | 0.9978134 | 0.0009853 | 0.0001107 |
| G*  | 0.1490536 | 0.7642751 | 0.0371    | 0.0236887 | 0.0258825 |
| G   | 0.0004088 | 0.003698  | 0.9824569 | 0.0130678 | 0.0003684 |
| G*  | 0.2613422 | 0.48649   | 0.144105  | 0.0028647 | 0.105198  |
| G   | 0.0005853 | 0.0000851 | 0.9993283 | 0.0000008 | 0.0000005 |
| G   | 0.000008  | 0.0000029 | 0.9999875 | 0.0000015 | 0.0000001 |

|    | CC        | CP        | G         | H         | Or        |
|----|-----------|-----------|-----------|-----------|-----------|
| G  | 0.00002   | 0.0003144 | 0.9996274 | 0.000031  | 0.0000073 |
| G  | 0.0005155 | 0.0006335 | 0.9988441 | 0.0000036 | 0.0000032 |
| G  | 0.0010856 | 0.0036734 | 0.9779568 | 0.0171821 | 0.0001021 |
| G  | 0.0000293 | 0.0000148 | 0.998951  | 0.0010042 | 0.0000008 |
| G  | 0.0309487 | 0.0028045 | 0.9609482 | 0.0050069 | 0.0002918 |
| G  | 0.0000001 | 0.0000002 | 0.9999993 | 0.0000003 | 0         |
| G  | 0.00002   | 0.000005  | 0.9999443 | 0.0000293 | 0.0000014 |
| G  | 0.0012235 | 0.0001454 | 0.9986269 | 0.0000001 | 0.0000041 |
| G  | 0.0002514 | 0.0002909 | 0.9993288 | 0.0000754 | 0.0000535 |
| G  | 0.0000131 | 0.0001741 | 0.9998006 | 0.0000097 | 0.0000025 |
| G  | 0.0000003 | 0         | 0.9999994 | 0.0000003 | 0         |
| G  | 0.0000002 | 0.0000001 | 0.9999995 | 0         | 0.0000001 |
| G  | 0.0000037 | 0.0000043 | 0.9999903 | 0.0000015 | 0.0000002 |
| G  | 0.0000004 | 0.0000229 | 0.9999757 | 0.0000006 | 0.0000004 |
| G  | 0.0000276 | 0.0000006 | 0.9998909 | 0.0000778 | 0.0000031 |
| G  | 0.0072587 | 0.0060684 | 0.9767128 | 0.0098903 | 0.0000698 |
| G  | 0         | 0.0000001 | 0.9999992 | 0.0000007 | 0         |
| G  | 0.0015053 | 0.0152875 | 0.9831761 | 0.000026  | 0.0000051 |
| G  | 0.0128515 | 0.0391808 | 0.901913  | 0.0426174 | 0.0034374 |
| G  | 0.3990521 | 0.0379907 | 0.5563368 | 0.0034262 | 0.0031942 |
| G* | 0.6428438 | 0.2982391 | 0.0143092 | 0.0002557 | 0.0443523 |
| G  | 0.0000019 | 0.0001704 | 0.9974648 | 0.0023619 | 0.0000001 |
| G  | 0.0000482 | 0.0000052 | 0.9999466 | 0         | 0         |
| G  | 0.0000028 | 0.0000017 | 0.9999955 | 0         | 0.0000001 |
| H  | 0.0000658 | 0.0018519 | 0.000033  | 0.5655553 | 0.432494  |
| H  | 0.2805953 | 0.1729189 | 0.0001302 | 0.4706625 | 0.0756932 |
| H  | 0.00007   | 0.0002416 | 0.0000525 | 0.9966573 | 0.0029787 |
| H  | 0.001351  | 0.0325126 | 0.0008818 | 0.9511619 | 0.0140927 |
| H  | 0.0022218 | 0.0006386 | 0.0000034 | 0.7601299 | 0.2370064 |
| H  | 0.0012676 | 0.040602  | 0.0004896 | 0.8373147 | 0.120326  |
| H  | 0.0000035 | 0.000082  | 0.0000311 | 0.9957412 | 0.0041421 |
| H  | 0.0049312 | 0.0147757 | 0.0009439 | 0.9639083 | 0.0154408 |
| H  | 0.0001159 | 0.0003082 | 0.0000018 | 0.9994787 | 0.0000954 |
| H  | 0.0002826 | 0.0002588 | 0.0004948 | 0.969901  | 0.0290627 |
| H  | 0.0002763 | 0.0044907 | 0.0000248 | 0.9940249 | 0.0011833 |
| H  | 0.0000014 | 0.0000222 | 0.0000014 | 0.9998938 | 0.0000812 |
| H  | 0.0003656 | 0.0006731 | 0.0000068 | 0.9758056 | 0.0231489 |
| H  | 0.0001592 | 0.0021347 | 0.000017  | 0.8311077 | 0.1665814 |

|     | CC        | CP        | G         | H         | Or        |
|-----|-----------|-----------|-----------|-----------|-----------|
| H   | 0.0000011 | 0.0000044 | 0.0000007 | 0.9999478 | 0.000046  |
| H   | 0.0000568 | 0.0006844 | 0.0001181 | 0.9788412 | 0.0202995 |
| H*  | 0.0364444 | 0.5305181 | 0.0000109 | 0.2974929 | 0.1355338 |
| H   | 0.000091  | 0.001214  | 0.0017488 | 0.774733  | 0.2222133 |
| H   | 0.0000022 | 0.0020507 | 0.0000021 | 0.9941866 | 0.0037584 |
| H   | 0.0005147 | 0.0008583 | 0.0000007 | 0.8635222 | 0.1351041 |
| H   | 0.0000071 | 0.0000894 | 0.0000082 | 0.9013509 | 0.0985444 |
| H   | 0.0974967 | 0.0873173 | 0.0001265 | 0.6667276 | 0.1483319 |
| H   | 0.001011  | 0.0053625 | 0.0002811 | 0.9903835 | 0.0029619 |
| H*  | 0.0242491 | 0.603615  | 0.0000111 | 0.2858848 | 0.0862401 |
| H*  | 0.0007314 | 0.0353335 | 0.0001017 | 0.4308796 | 0.5329537 |
| H   | 0.0956258 | 0.2042756 | 0.0000753 | 0.6889521 | 0.0110712 |
| H   | 0.0177787 | 0.1034752 | 0.0000057 | 0.8641585 | 0.0145818 |
| H   | 0.0035292 | 0.0072251 | 0.0000085 | 0.9077782 | 0.081459  |
| H   | 0.0098735 | 0.0193598 | 0.0032334 | 0.9617103 | 0.005823  |
| H   | 0.0002062 | 0.0009605 | 0.0000077 | 0.986808  | 0.0120176 |
| H   | 0.000054  | 0.0006048 | 0.0000052 | 0.998037  | 0.0012991 |
| H   | 0.0000003 | 0.0000165 | 0.0000214 | 0.9996987 | 0.0002631 |
| H   | 0.0000114 | 0.0001574 | 0.0000001 | 0.9989477 | 0.0008833 |
| H   | 0.0010863 | 0.0671937 | 0.0005028 | 0.907827  | 0.0233903 |
| H   | 0.0011132 | 0.0304459 | 0.0005737 | 0.7578022 | 0.210065  |
| H   | 0.000012  | 0.0003175 | 0.0000065 | 0.9995142 | 0.0001498 |
| H   | 0.0011189 | 0.0140752 | 0.000013  | 0.9842531 | 0.0005398 |
| H   | 0.0000431 | 0.0010075 | 0.0000011 | 0.9988948 | 0.0000534 |
| H   | 0.0000035 | 0.0002643 | 0.0000046 | 0.9993635 | 0.0003641 |
| H   | 0.0000006 | 0.0000128 | 0.0000279 | 0.996532  | 0.0034266 |
| H   | 0.0409676 | 0.4611186 | 0.0003767 | 0.4876283 | 0.0099088 |
| OR* | 0.5425689 | 0.4511019 | 0.0000304 | 0.0000221 | 0.0062768 |
| OR  | 0.0069468 | 0.0319946 | 0.0000083 | 0.3415685 | 0.6194817 |
| OR  | 0.0004336 | 0.0452325 | 0.0006227 | 0.4375702 | 0.5161409 |
| OR* | 0.0120737 | 0.2812874 | 0.0000022 | 0.5477736 | 0.1588631 |
| OR  | 0.0402994 | 0.0196234 | 0.000004  | 0.0563641 | 0.8837091 |
| OR  | 0.0171126 | 0.0275104 | 0.0362071 | 0.1158234 | 0.8033465 |
| OR  | 0.0070737 | 0.1249722 | 0.0000612 | 0.0439587 | 0.8239342 |
| OR  | 0.2163153 | 0.0009338 | 0.0013312 | 0.0000496 | 0.78137   |
| OR  | 0.0002074 | 0.0003031 | 0         | 0.0051011 | 0.9943884 |
| OR  | 0.0856166 | 0.0404632 | 0.000001  | 0.2411834 | 0.6327358 |
| OR  | 0.2811833 | 0.1599371 | 0.0000054 | 0.0572328 | 0.5016414 |

|     | <b>CC</b> | <b>CP</b> | <b>G</b>  | <b>H</b>  | <b>Or</b> |
|-----|-----------|-----------|-----------|-----------|-----------|
| OR  | 0.0026121 | 0.0025622 | 0.0000006 | 0.000989  | 0.993836  |
| OR* | 0.1247581 | 0.5600658 | 0.0000005 | 0.0085354 | 0.3066401 |
| OR  | 0.0148916 | 0.0898333 | 0.0000006 | 0.0140043 | 0.8812702 |
| OR  | 0.000003  | 0.0002755 | 0.0000001 | 0.0102502 | 0.9894711 |
| OR  | 0.0000004 | 0.0000169 | 0         | 0.0003396 | 0.999643  |

Shading indicates fossil specimens. Asterisks indicate incorrect classifications. A. L. 822-1 and MAK-VP 1/83, *Australopithecus afarensis*; SK 23 and SK 34, *Au. robustus*; GWM5sw/P56, *Ardipithecus ramidus*; CC, common chimpanzee; CP, pygmy chimpanzee; G, gorilla; H, *Homo sapiens*; Or, orangutan.
